# Supplementary material for: The stool syndecan2 methylation test is more robust than blood tests for methylated septin9, CEA, CA19-9 and CA724: a diagnostic test for the early detection of colorectal neoplasms
Source: PubMed Central journal article supplement — Transl Cancer Res. 2023 Jan 6;12(1):65–77. doi: 10.21037/tcr-22-1710 (PMC9906059; doi:10.21037/tcr-22-1710), 2023-01-06
Supplement: tcr-12-01-65-dss.pdf [file tcr-12-01-65-dss.pdf]

## Data Sharing Statement

|                     |                                                                                                                                                    |                                                                                                                                                 |
|---------------------|----------------------------------------------------------------------------------------------------------------------------------------------------|-------------------------------------------------------------------------------------------------------------------------------------------------|
| <b>Article Info</b> | https://dx.doi.org/10.21037/tcr-22-1710                                                                                                            |                                                                                                                                                 |
| <b>Item</b>         | <b>Question</b>                                                                                                                                    | <b>Authors' Response</b><br>(place "-" if not applicable)                                                                                       |
| 1                   | Would you like to share data collected for your study to others?                                                                                   | Yes                                                                                                                                             |
| 2                   | If not, would you like to share the reason for your decision?                                                                                      | -                                                                                                                                               |
| 3                   | What data in particular will be shared?                                                                                                            | The source data in this study will be shared with the corresponding author's permission.                                                        |
| 4                   | Any other documents will be share? Such as study protocol, statistical analysis plan, informed consent form, clinical study report, analytic code. | Study protocol, statistical analysis plan, and analytic code will also be shared if requested.                                                  |
| 5                   | When will data availability begin?                                                                                                                 | From the publication date.                                                                                                                      |
| 6                   | When will data availability end?                                                                                                                   | Two years within the publication date.                                                                                                          |
| 7                   | To whom will you share the data?                                                                                                                   | All researchers who are interested in our research                                                                                              |
| 8                   | For what type of analysis or purpose?                                                                                                              | To evaluate the purity and yield of recombinant proteins for further drug screening study                                                       |
| 9                   | How or where can the data/documents be obtained?                                                                                                   | Emails could be sent to the address below to obtain the shared data: <a href="mailto:chunze.zhang@nankai.edu.cn">chunze.zhang@nankai.edu.cn</a> |
| 10                  | Any other restrictions?                                                                                                                            | We may balance the potential benefits and risks for each request and then provide the data that could be shared                                 |
