# Supplementary material for: The stool syndecan2 methylation test is more robust than blood tests for methylated septin9, CEA, CA19-9 and CA724: a diagnostic test for the early detection of colorectal neoplasms
Source: PubMed Central journal article supplement — Transl Cancer Res. 2023 Jan 6;12(1):65–77. doi: 10.21037/tcr-22-1710 (PMC9906059; doi:10.21037/tcr-22-1710), 2023-01-06
Supplement: tcr-12-01-65-supplementary.pdf [file tcr-12-01-65-supplementary.pdf]

**Table S1** Interfering disease types and the effect on the outcome of tests

| Disease types and distribution           | Number of positive/total tested number |               |           |              |             |
|------------------------------------------|----------------------------------------|---------------|-----------|--------------|-------------|
|                                          | Stool mSDC2                            | Plasma mSEPT9 | Serum CEA | Serum CA19-9 | Serum CA724 |
| Non-CRC cancers                          | 6/16                                   | 4/12          | 3/16      | 4/11         | 2/13        |
| GI cancers                               |                                        |               |           |              |             |
| Gastric cancer                           | 0/4                                    | 0/3           | 0/4       | 1/4          | 0/4         |
| Small intestine cancer                   | 1/2                                    | 0/1           | 1/2       | 1/2          | 0/2         |
| Non-GI cancers                           |                                        |               |           |              |             |
| Prostate cancer                          | 1/4                                    | 3/4           | 1/4       | 2/2          | 0/2         |
| Lymphoma                                 | 3/3                                    | 0/3           | 0/3       | 0/3          | 0/2         |
| Lung cancer                              | 1/2                                    | 1/1           | 0/2       | 0/0          | 1/2         |
| Cancer of the female reproductive system | 0/1                                    | 0/0           | 1/1       | 0/0          | 1/1         |
| Non-neoplasm GI disorders                | 42/357                                 | 4/31          | 1/60      | 1/48         | 6/50        |
| Polyps                                   | 3/34                                   | 0/8           | 1/14      | 0/12         | 1/11        |
| Inflammatory bowel disease               | 1/7                                    | 0/1           | 0/6       | 0/6          | 1/6         |
| Gastritis                                | 0/1                                    | 0/0           | 0/1       | 0/0          | 0/0         |
| Hemorrhoids                              | 26/224                                 | 1/11          | 0/19      | 0/14         | 2/15        |
| Perianal fistulas                        | 8/55                                   | 0/2           | 0/9       | 0/6          | 2/8         |
| Abscesses                                | 1/14                                   | 1/2           | 0/1       | 0/1          | 0/1         |
| Colonic angiodysplasia                   | 0/1                                    | 0/0           | 0/1       | 0/1          | 0/1         |
| Neuroendocrine tumor                     | 0/5                                    | 1/3           | 0/3       | 1/2          | 0/2         |
| Rectal prolapse                          | 0/3                                    | 0/1           | 0/1       | 0/1          | 0/1         |
| Intestinal tuberculosis                  | 0/1                                    | 0/1           | 0/1       | 0/0          | 0/0         |
| Cholecystitis                            | 0/1                                    | 0/0           | 0/1       | 0/1          | 0/1         |
| Hairy sinus tract                        | 0/1                                    | 0/0           | 0/0       | 0/0          | 0/0         |
| Anal fissure                             | 3/7                                    | 0/0           | 0/0       | 0/0          | 0/0         |
| Lipomyoma                                | 0/1                                    | 0/0           | 0/1       | 0/1          | 0/1         |
| Melanoma                                 | 0/2                                    | 1/2           | 0/2       | 0/2          | 0/2         |
| Other non-GI disorders                   | 0/7                                    | 1/4           | 2/6       | 0/4          | 1/4         |
| Rheumatoid arthritis                     | 0/1                                    | 0/0           | 0/1       | 0/1          | 0/1         |
| Schwannoma                               | 0/1                                    | 0/1           | 0/1       | 0/1          | 0/1         |
| Hernia                                   | 0/2                                    | 1/1           | 2/2       | 0/2          | 1/2         |
| Presacral cyst                           | 0/1                                    | 0/1           | 0/1       | 0/0          | 0/0         |
| Pelvic benign tumor                      | 0/1                                    | 0/1           | 0/1       | 0/0          | 0/0         |
| Leiomyoma                                | 0/1                                    | 0/0           | 0/0       | 0/0          | 0/0         |

mSDC2, methylated *syndecan2*; mSEPT9, methylated *septin9*; CEA, carcinoembryonic antigen; CA19-9, carbohydrate antigen 19-9; CA724, carbohydrate antigen 724; CRC, colorectal cancer; GI, gastrointestinal.

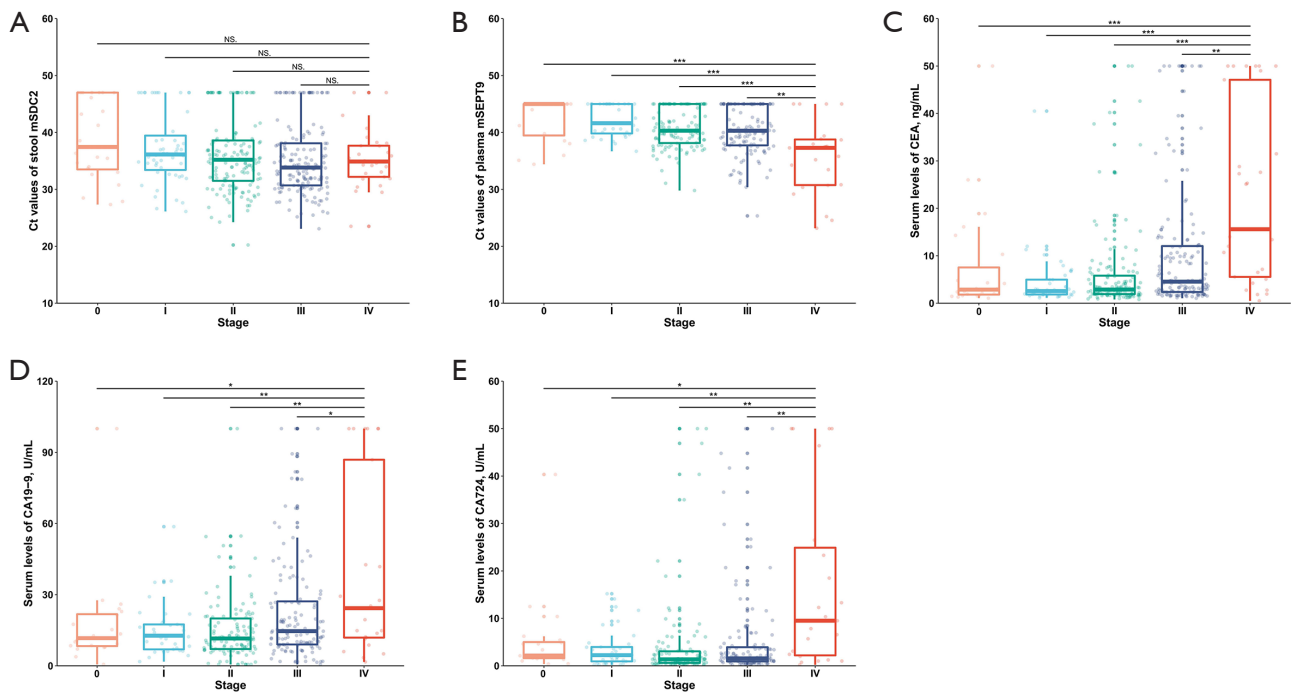

**Figure S1** Levels of five biomarkers according to CRC stage. (A) Levels of methylated SDC2 in stool. (B) Levels of methylated SEPT9 in plasma. (C) Levels of CEA in serum. (D) Levels of CA19-9 in serum. (E) Levels of CA724 in serum. \*\*\*,  $P < 0.001$ ; \*\*,  $P < 0.01$ ; \*,  $P < 0.05$ . NS., nonsignificant; CRC, colorectal cancer; SDC2, *syndecan2*; SEPT9, *septin9*; CEA, carcinoembryonic antigen; CA19-9, carbohydrate antigen 19-9; CA724, carbohydrate antigen 724.
